# Supplementary material for: The MIPAS/Envisat climatology (2002–2012) of polar stratospheric cloud volume density profiles
Source: Copernicus journal article supplement (doi:10.5194/amt-11-5901-2018), 2018-10-25
Supplement: Supplementary file 1 [file amt-11-5901-2018-supplement.pdf]

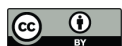

*Supplement of*

## **The MIPAS/Envisat climatology (2002–2012) of polar stratospheric cloud volume density profiles**

**Michael Höpfner et al.**

*Correspondence to:* Michael Höpfner ([michael.hoepfner@kit.edu](mailto:michael.hoepfner@kit.edu))

The copyright of individual parts of the supplement might differ from the CC BY 4.0 License.

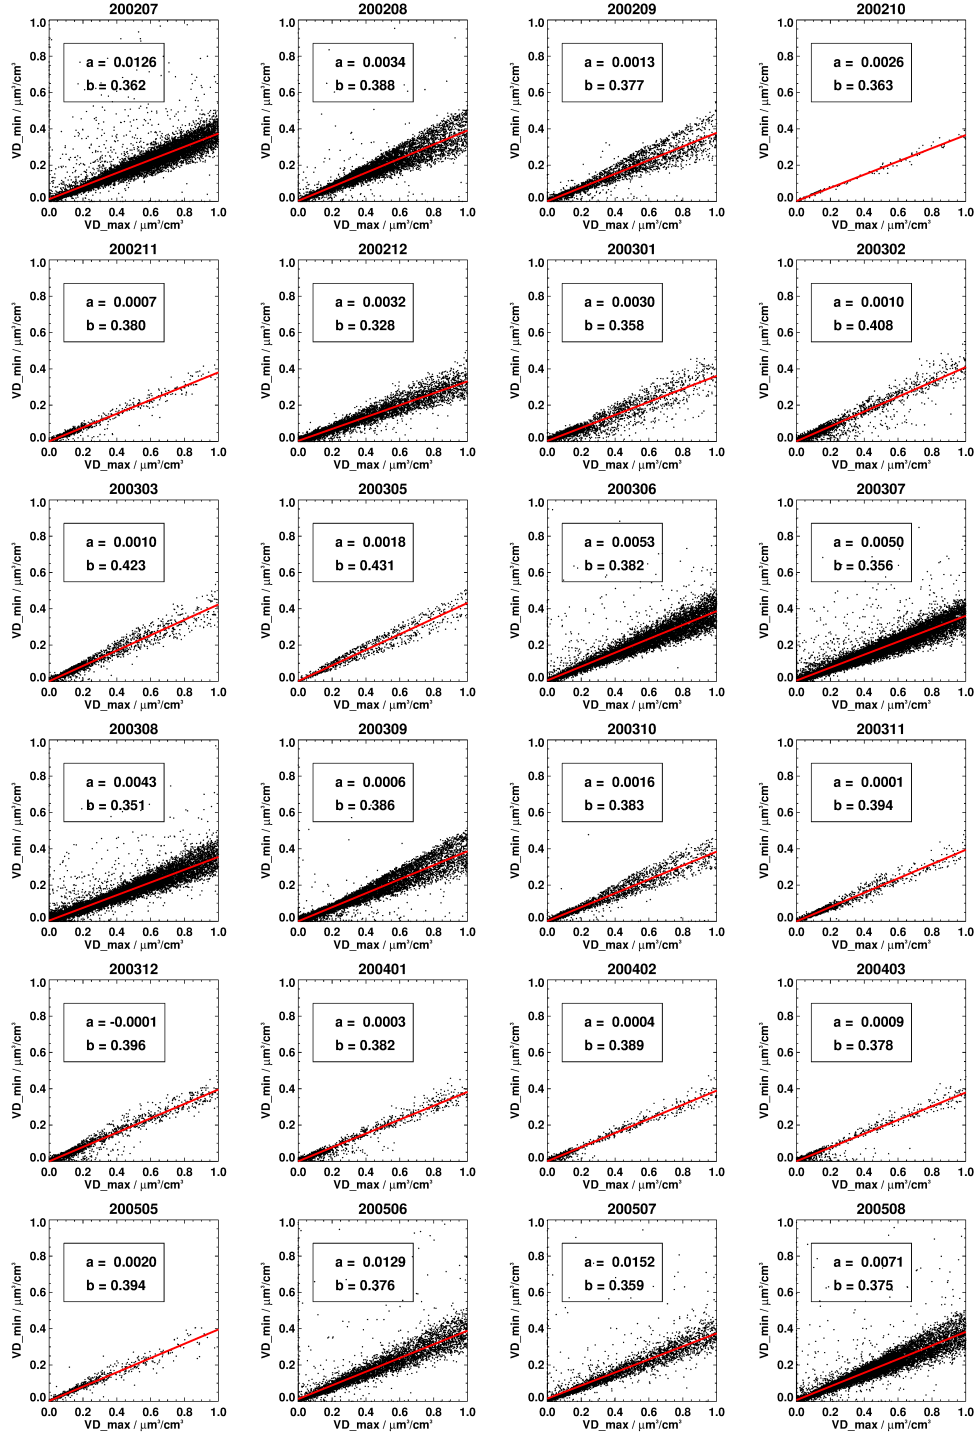

Figure S1: Correlations between all values of PSC volume density calculated under the assumptions for  $VD_{max}$  and  $VD_{min}$  retrievals (see text) for each month.

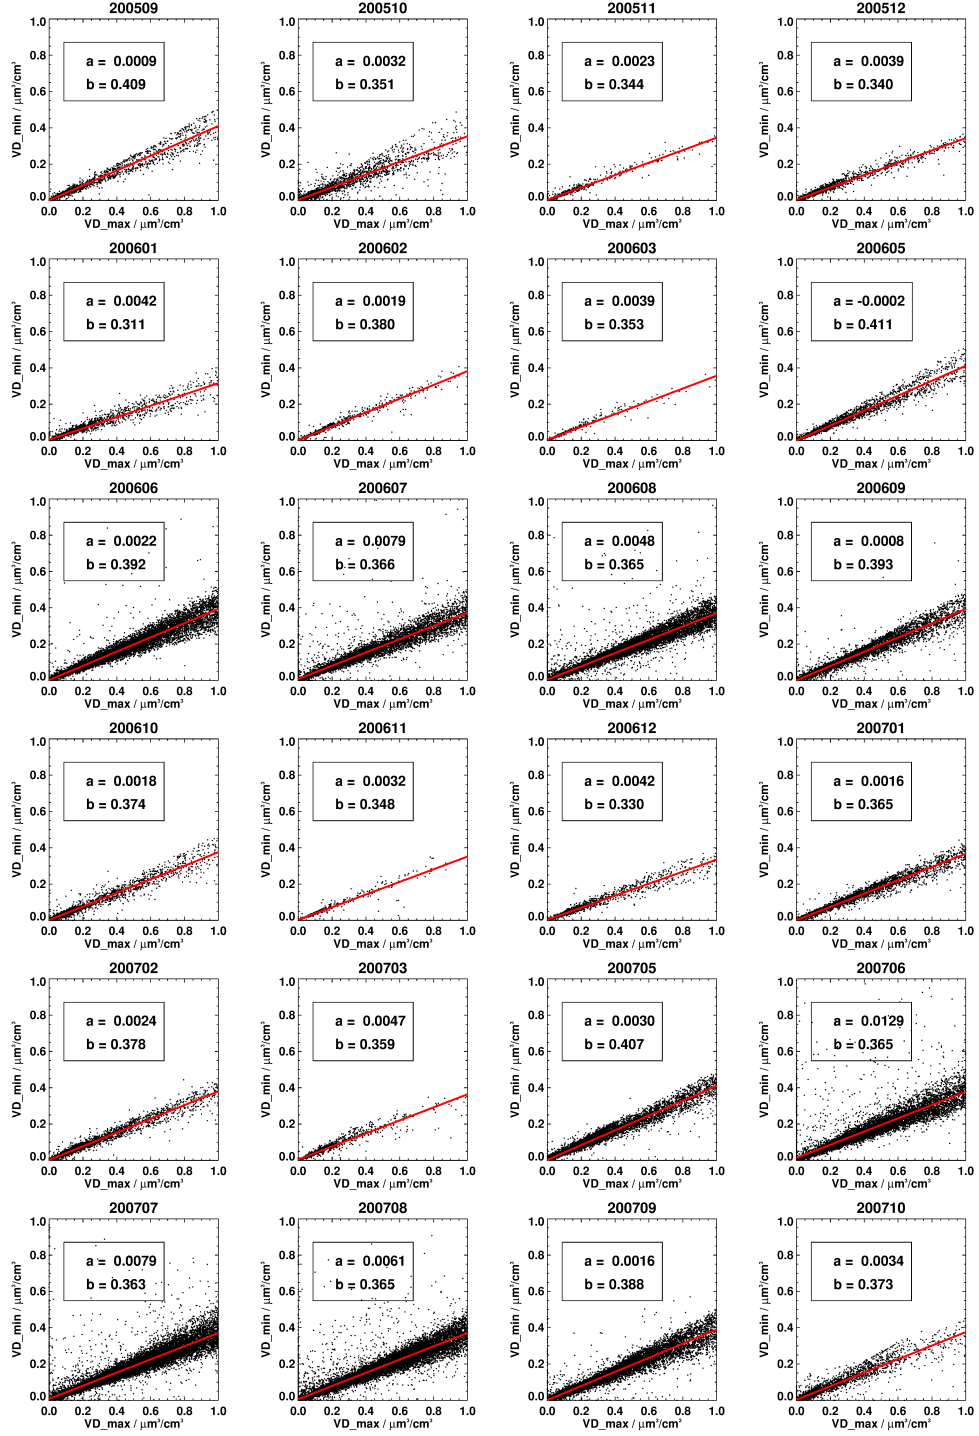

Figure S2: Fig. S1 continued.

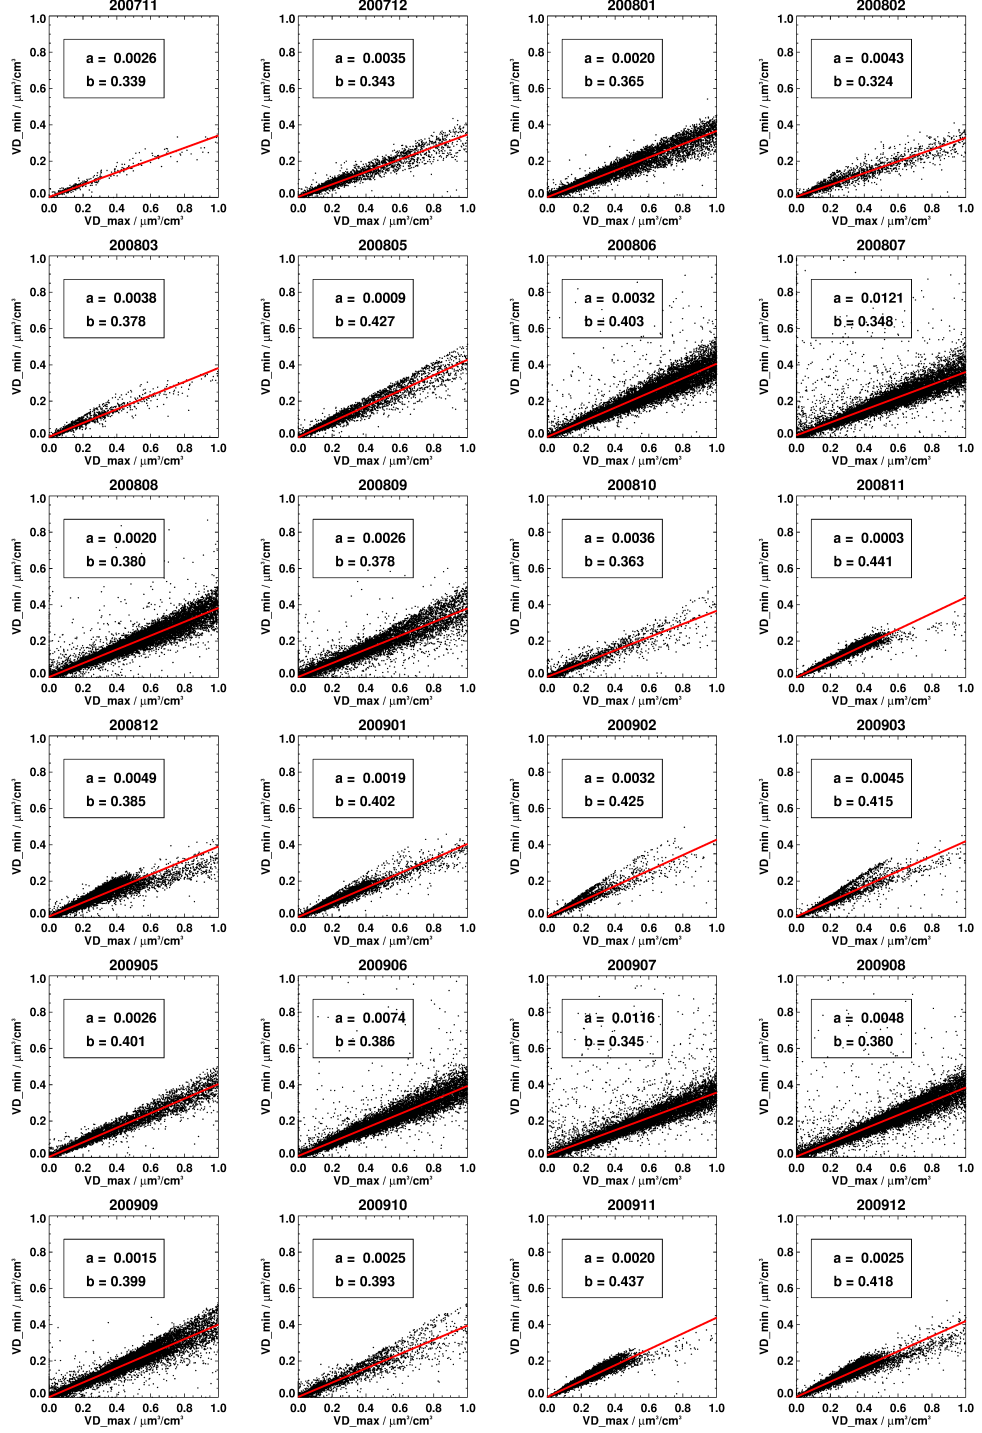

Figure S3: Fig. S1 continued.

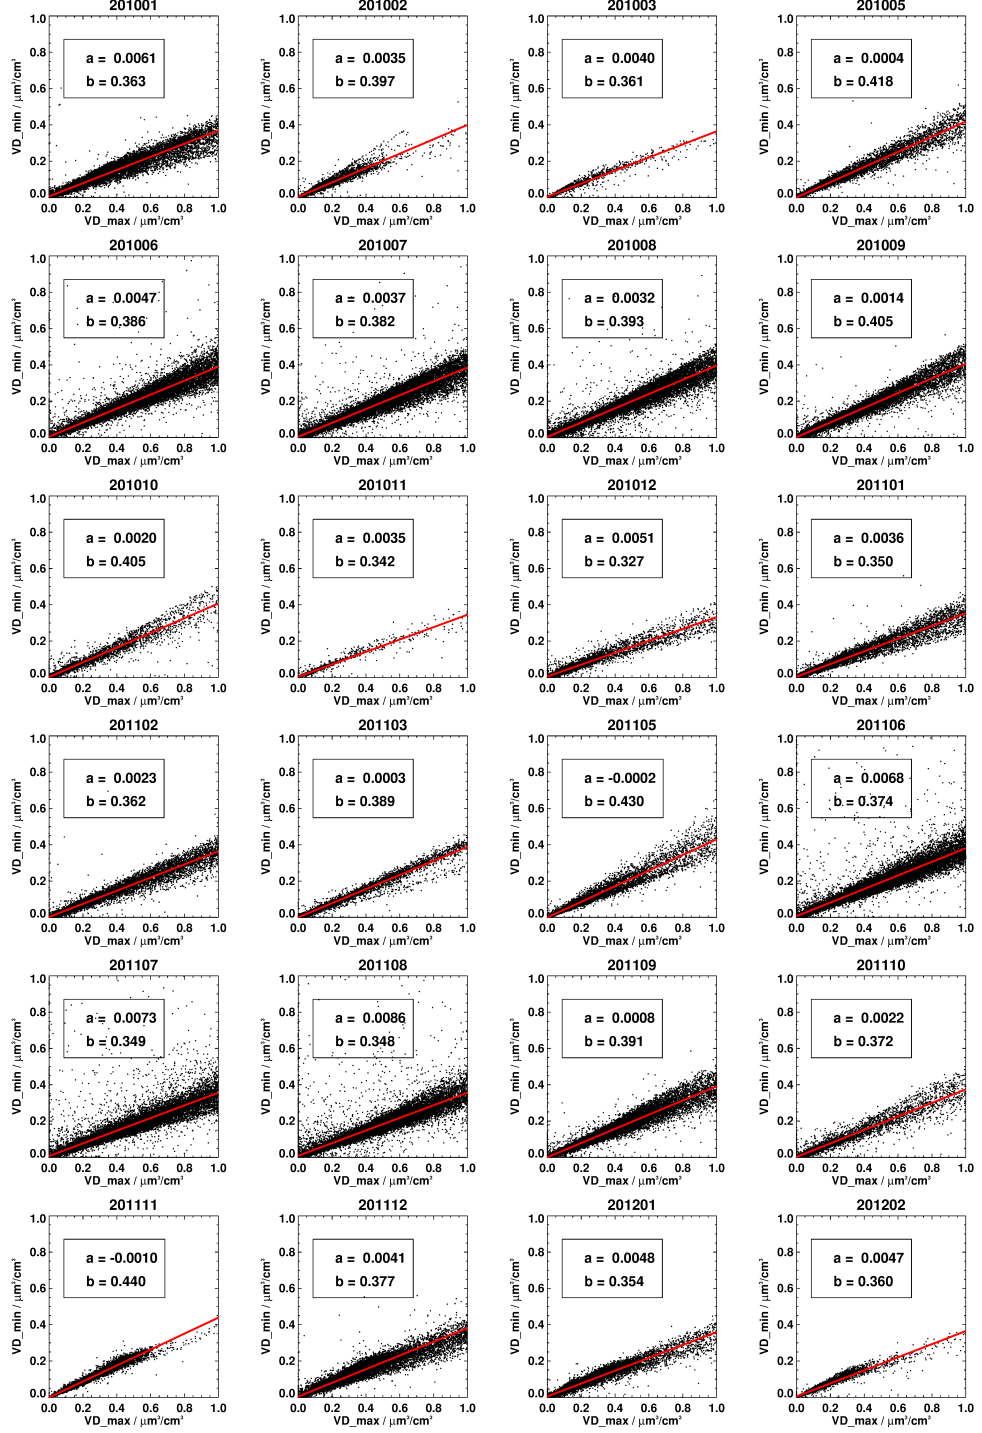

Figure S4: Fig. S1 continued.

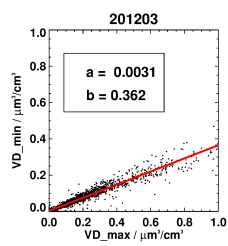

Figure S5: Fig. S1 continued.
